# Supplementary material
Source: publisher figshare collection journal article supplement (https://gsapubs.figshare.com/articles/dataset/_/14829360)
Supplement: Supplementary file 1 [file 1]

Gabet, E., 2021, Evaluating the role of topographic inversion in the formation of the Stanislaus Table Mountains in the Sierra Nevada (California, USA): GSA Bulletin, <https://doi.org/10.1130/B35940.1>.

## Supplemental Material

**The profile lines and lithological maps.**
